# Supplementary material for: Clinical, functional and radiographic consequences of achieving stable low disease activity and remission with adalimumab plus methotrexate or methotrexate alone in early rheumatoid arthritis: 26-week results from the randomised, controlled OPTIMA study
Source: PubMed Central journal article supplement — Ann Rheum Dis. 2012 May 19;72(1):64–71. doi: 10.1136/annrheumdis-2011-201247 (PMC3551224; doi:10.1136/annrheumdis-2011-201247), 2012-05-19

Supplemental Figure 1a. ACR20 Response Rates through 26 weeks

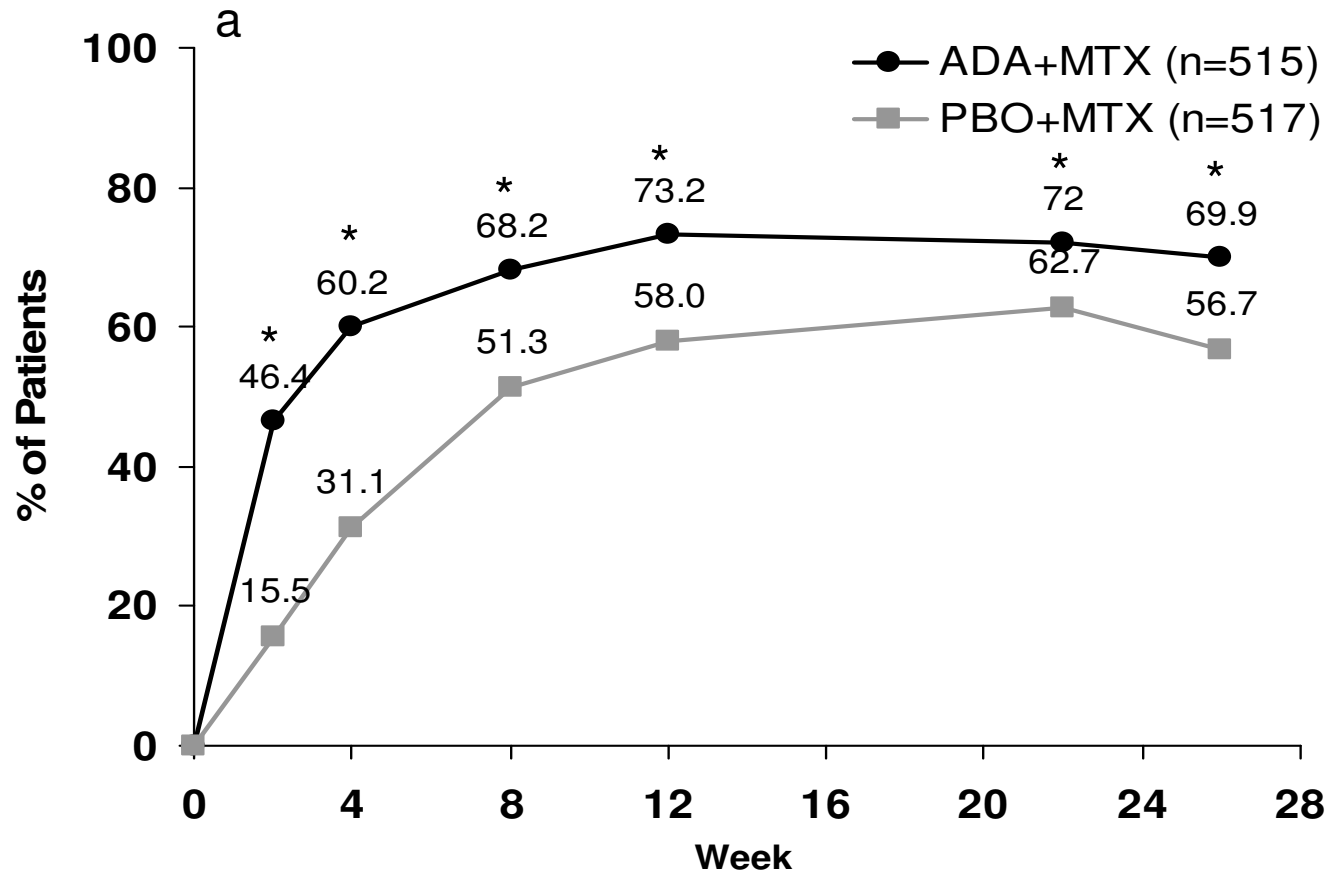

Supplemental Figure 1b. ACR50 Response Rates through 26 weeks

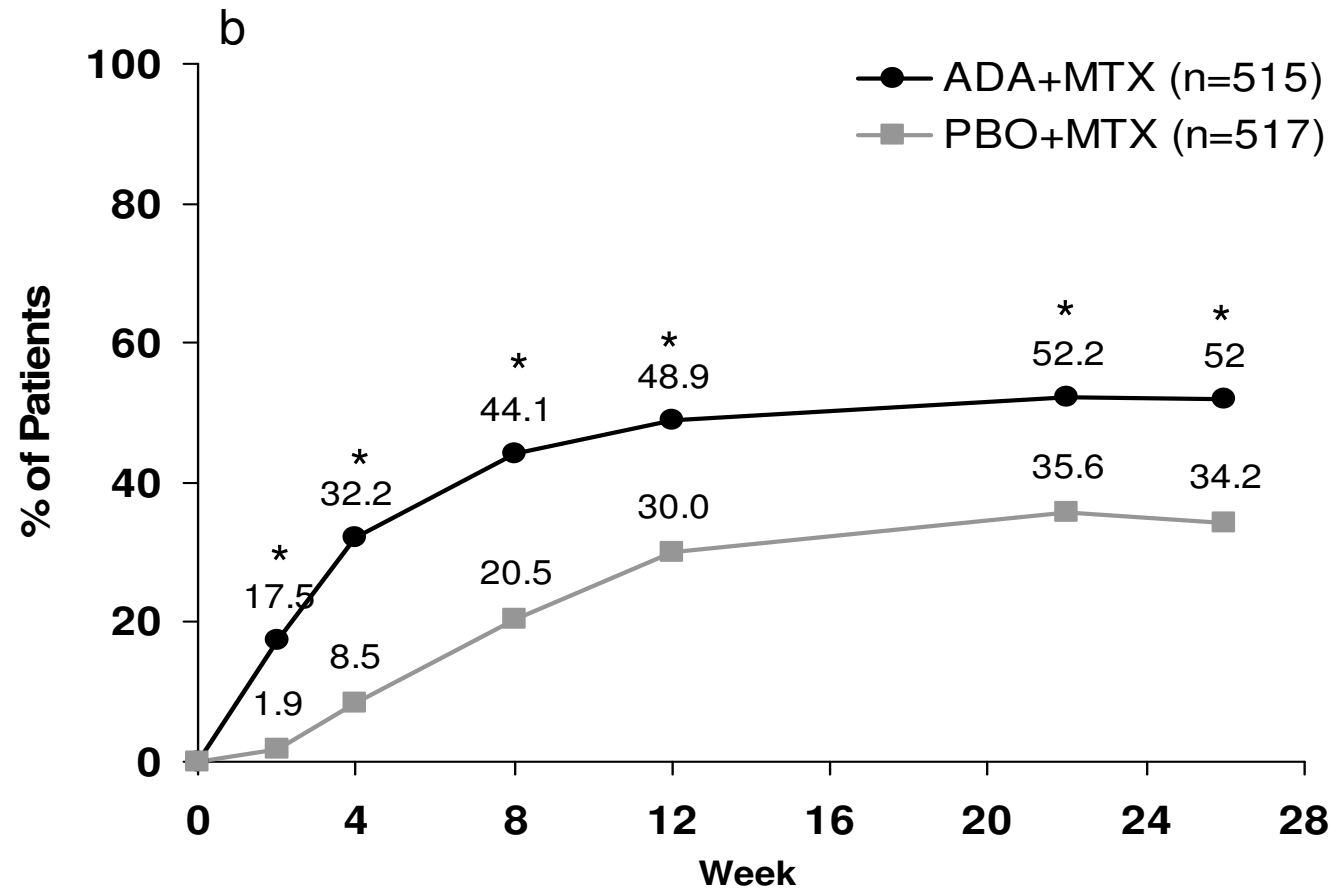

Supplemental Figure 1c. ACR70 Response Rates through 26 weeks

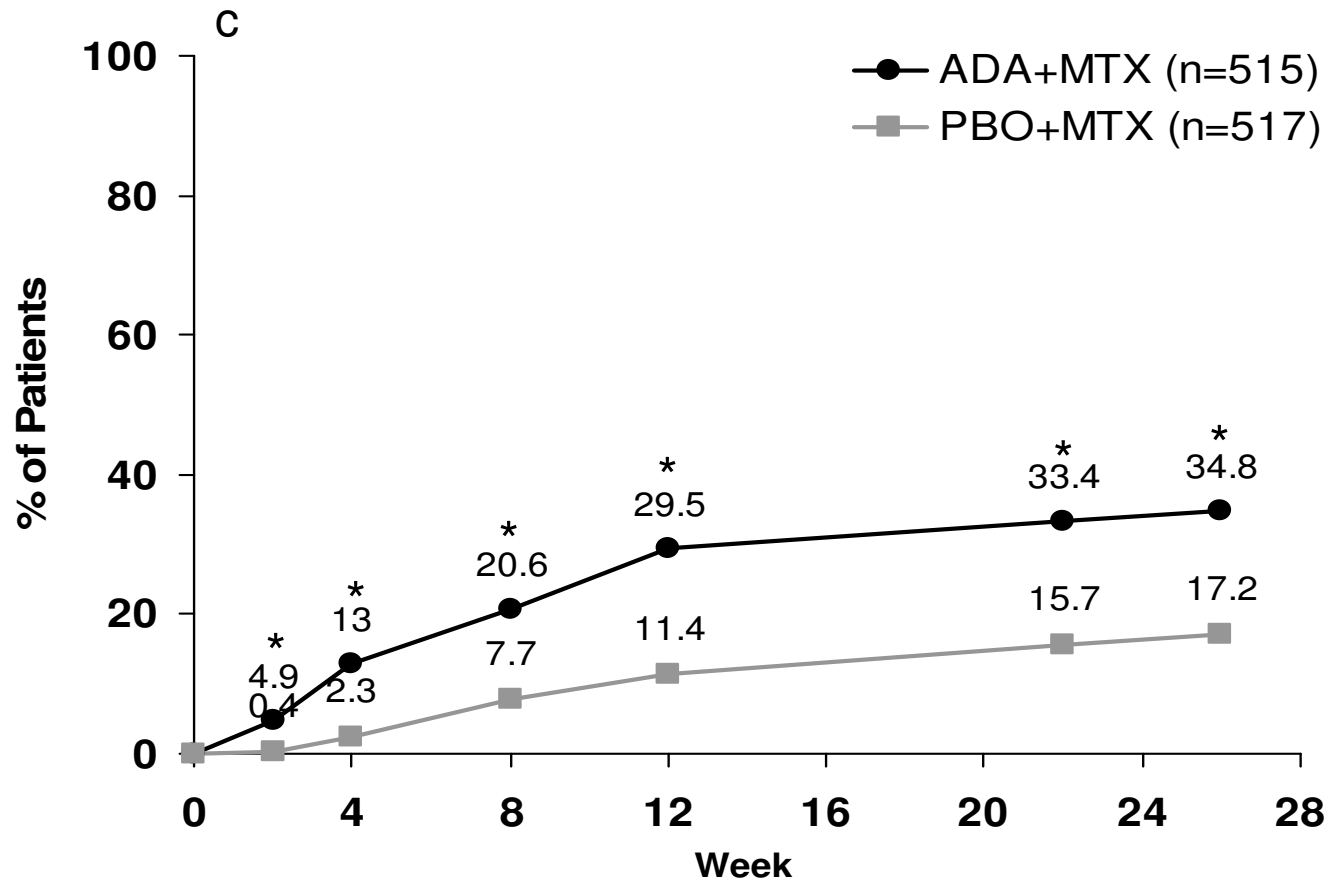

Supplement: annrheumdis-2011-201247-s1.pdf [file annrheumdis-2011-201247-s1.pdf]
