# Supplementary material for: Clinical, functional and radiographic consequences of achieving stable low disease activity and remission with adalimumab plus methotrexate or methotrexate alone in early rheumatoid arthritis: 26-week results from the randomised, controlled OPTIMA study
Source: PubMed Central journal article supplement — Ann Rheum Dis. 2012 May 19;72(1):64–71. doi: 10.1136/annrheumdis-2011-201247 (PMC3551224; doi:10.1136/annrheumdis-2011-201247), 2012-05-19
Supplement: annrheumdis-2011-201247-s2.pdf [file annrheumdis-2011-201247-s2.pdf]

Supplemental Figure 2a. Mean DAS28(CRP) through 26 weeks

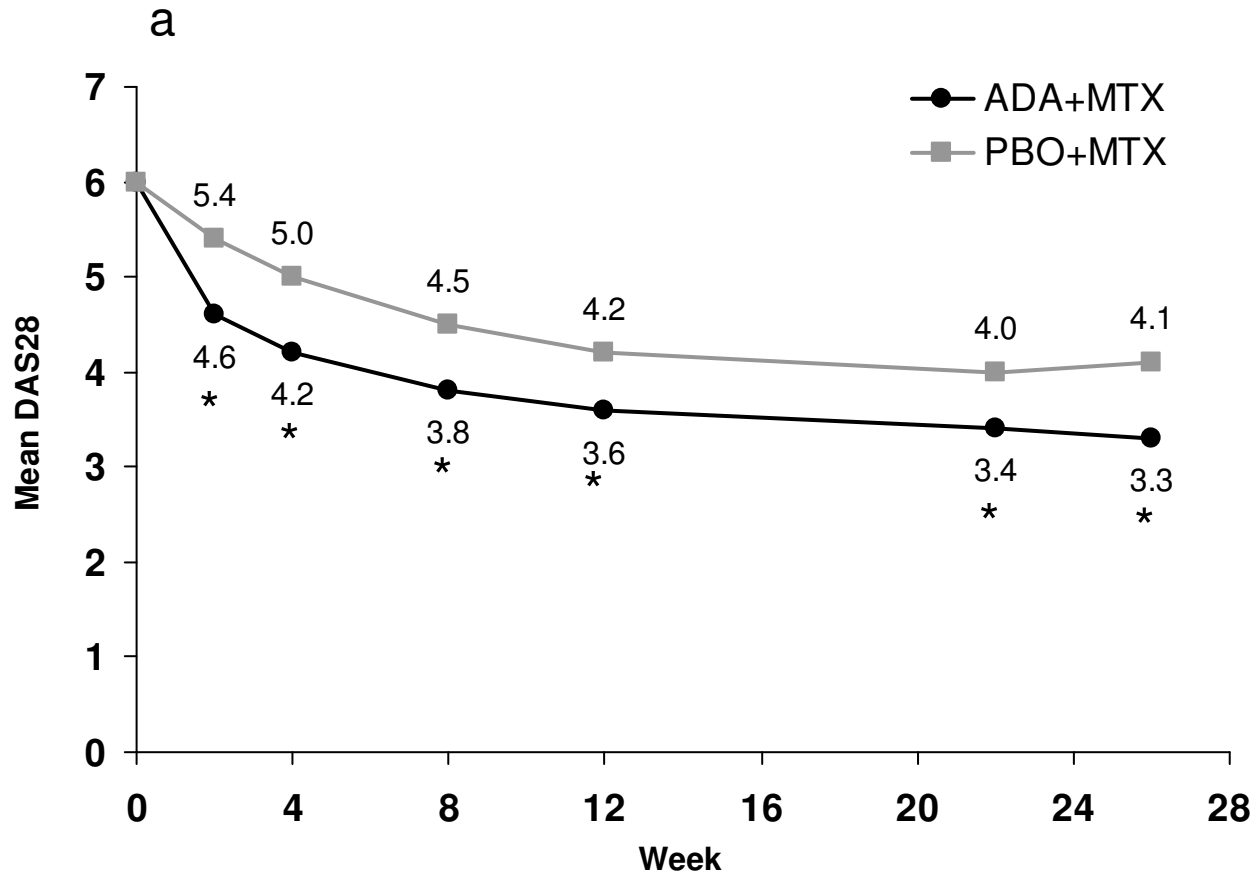

|             |     |     |     |     |     |     |     |
|-------------|-----|-----|-----|-----|-----|-----|-----|
| ADA+MTX, n: | 507 | 486 | 504 | 505 | 505 | 505 | 505 |
| PBO+MTX, n: | 505 | 483 | 496 | 498 | 498 | 499 | 499 |

Supplemental Figure 2b. Mean TJC28 through 26 weeks

b

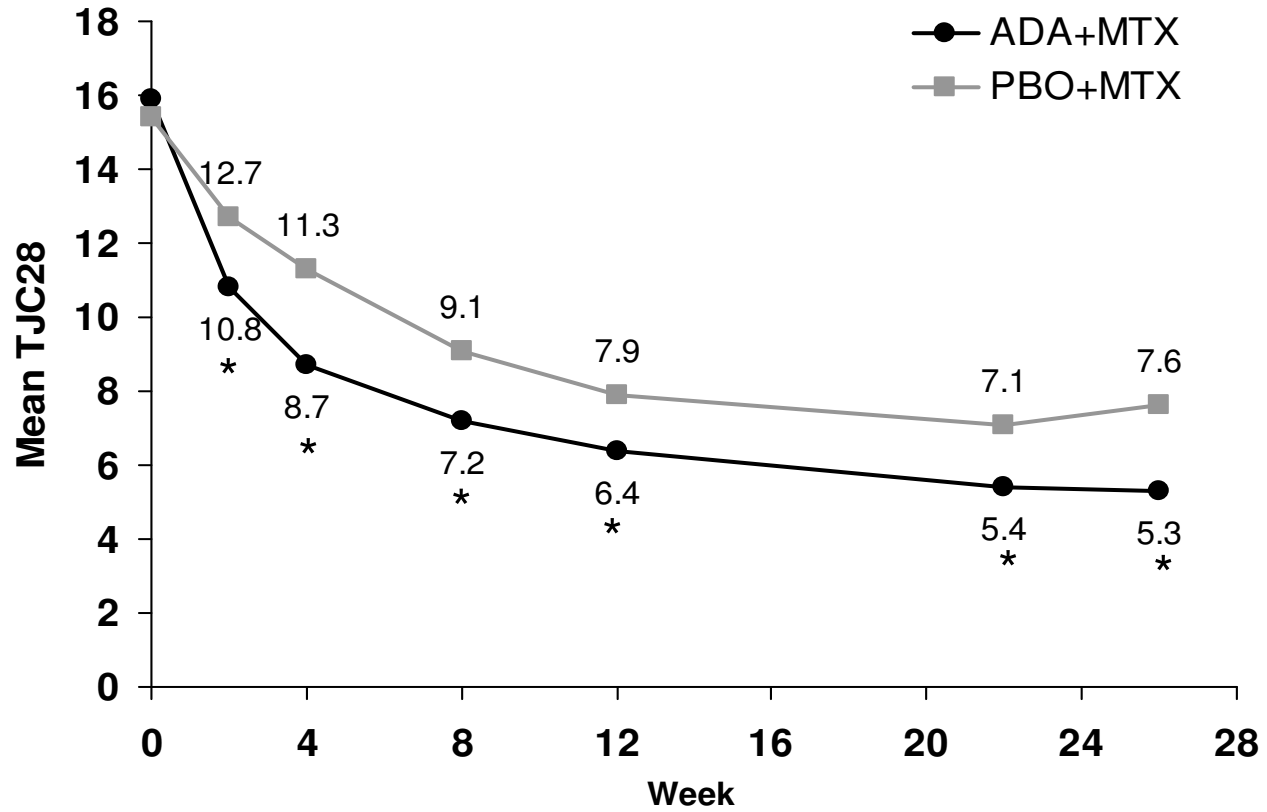

|             |     |     |     |     |     |     |     |
|-------------|-----|-----|-----|-----|-----|-----|-----|
| ADA+MTX, n: | 515 | 506 | 512 | 513 | 513 | 513 | 513 |
| PBO+MTX, n: | 517 | 507 | 514 | 514 | 514 | 514 | 514 |

Supplemental Figure 2c. Mean SJC28 through 26 weeks

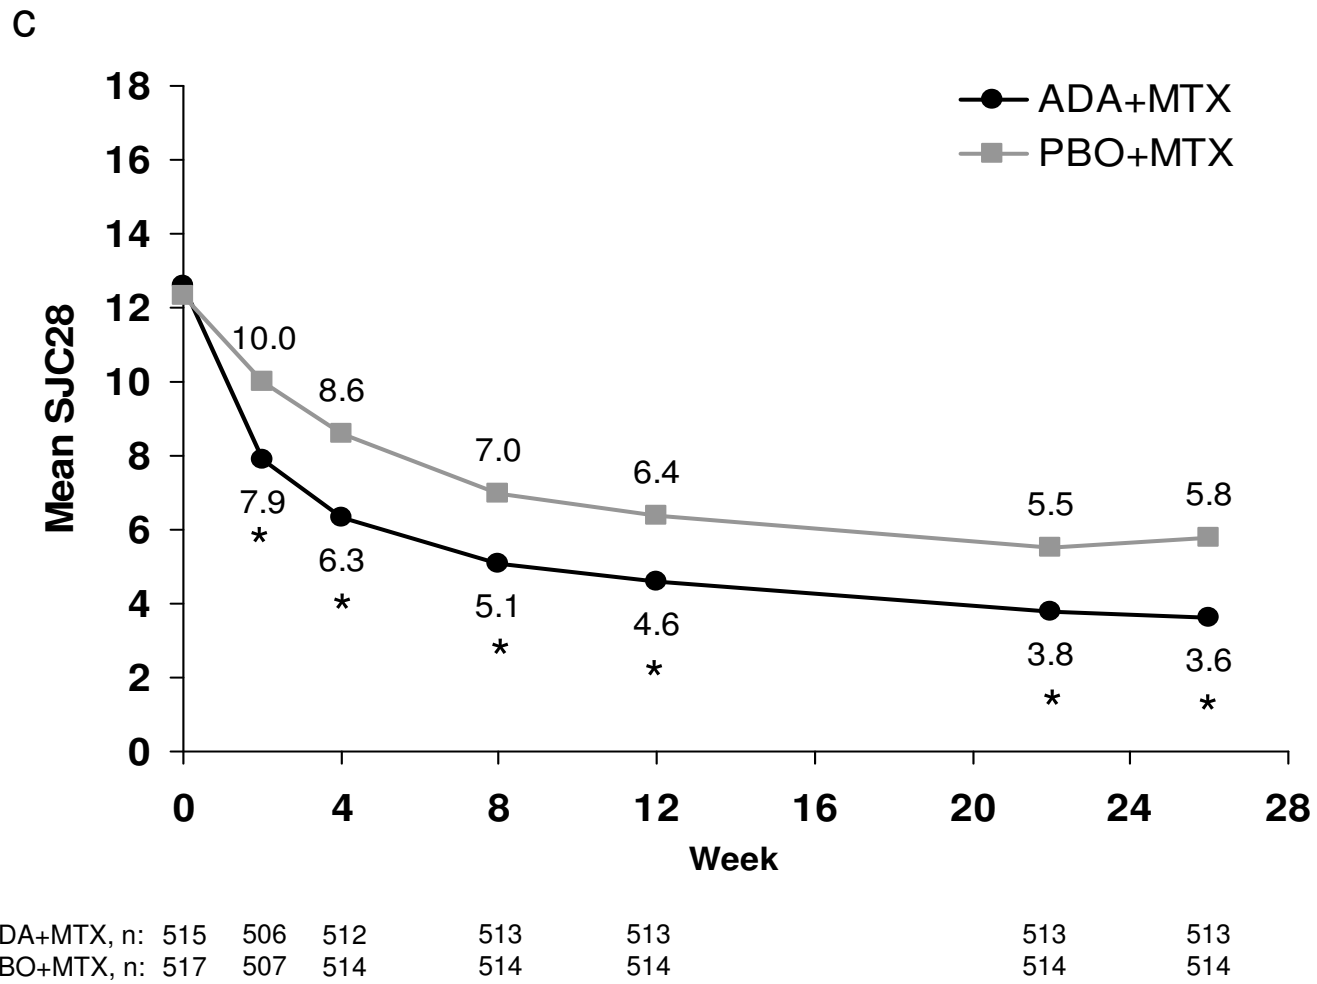

Supplemental Figure 2d. Mean CRP through 26 weeks

d

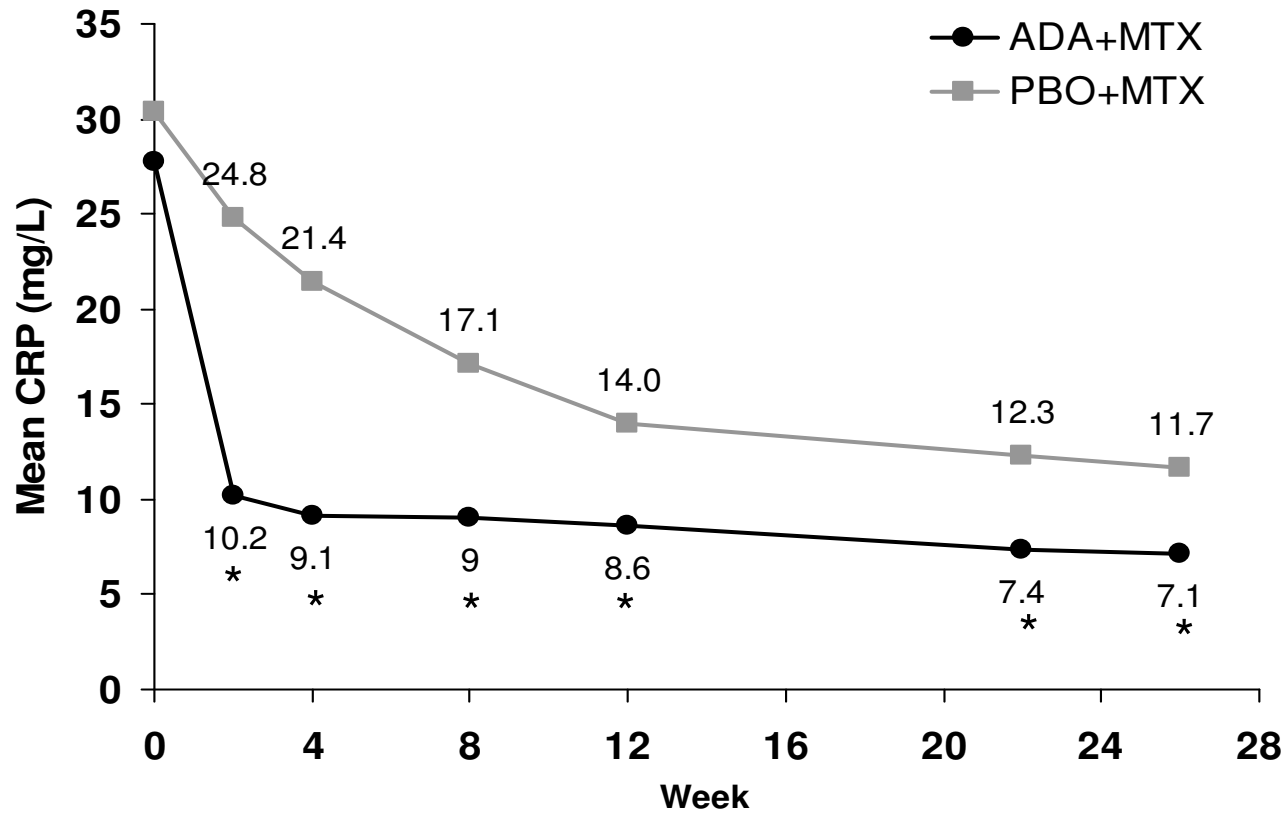

|             |     |     |     |     |     |     |     |
|-------------|-----|-----|-----|-----|-----|-----|-----|
| ADA+MTX, n: | 515 | 497 | 507 | 499 | 494 | 470 | 454 |
| PBO+MTX, n: | 517 | 499 | 497 | 486 | 482 | 465 | 446 |

Supplemental Figure 2e. Mean Patient's Global Assessment through 26 weeks

e

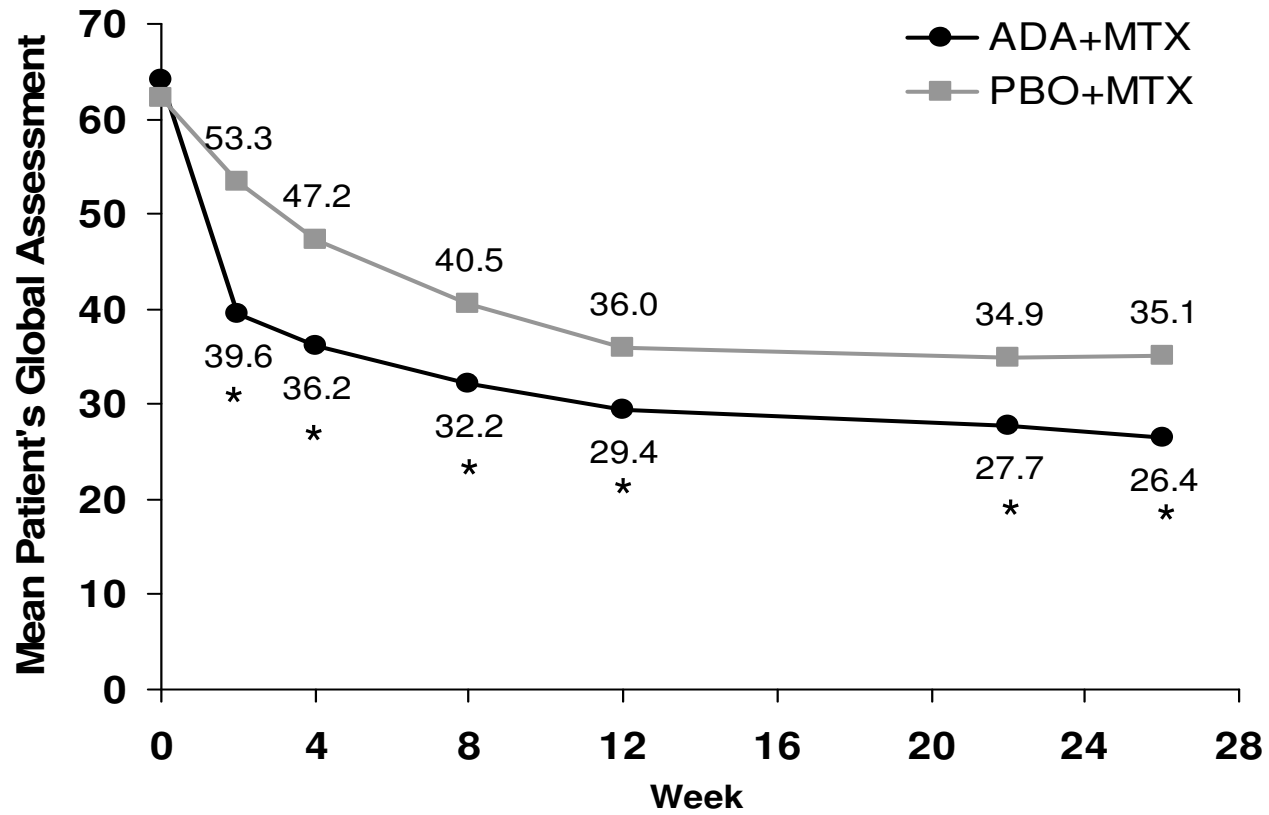

|             |     |     |     |     |     |     |     |
|-------------|-----|-----|-----|-----|-----|-----|-----|
| ADA+MTX, n: | 515 | 507 | 512 | 513 | 513 | 513 | 513 |
| PBO+MTX, n: | 517 | 510 | 513 | 513 | 513 | 513 | 513 |

Supplemental Figure 2f. Mean Physician's Global Assessment through 26 weeks

f

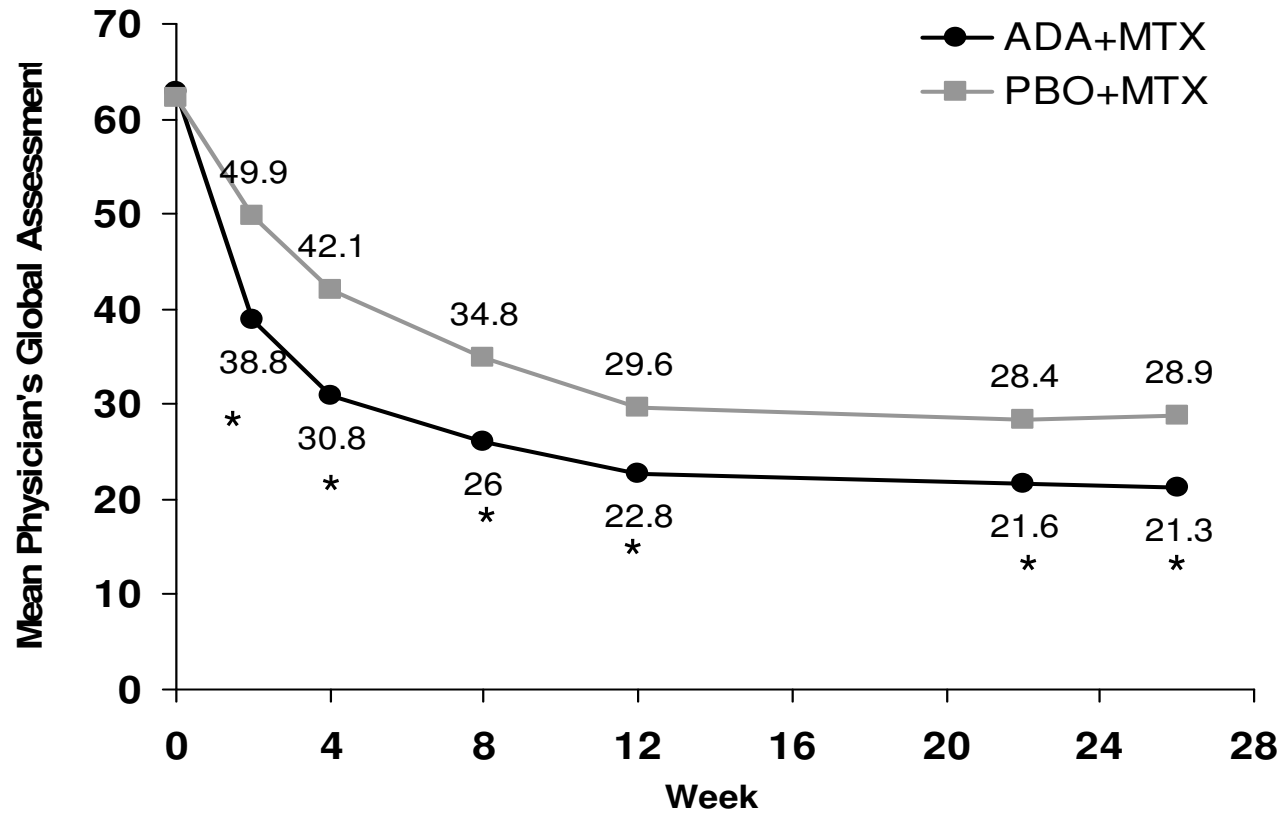

|             |     |     |     |     |     |     |     |
|-------------|-----|-----|-----|-----|-----|-----|-----|
| ADA+MTX, n: | 515 | 504 | 509 | 510 | 510 | 510 | 510 |
| PBO+MTX, n: | 517 | 507 | 513 | 513 | 513 | 513 | 513 |
